# Supplementary material for: Inositol Polyphosphate-5-Phosphatase F (INPP5F) inhibits STAT3 activity and suppresses gliomas tumorigenicity
Source: PubMed Central journal article supplement (PMC4256660; doi:10.1038/srep07330), 2014-12-05

**Inositol Polyphosphate-5-Phosphatase F (INPP5F) inhibits STAT3 activity  
and suppresses gliomas tumorigenicity**

Hong Sug Kim<sup>1,\*</sup>, Aiguo Li<sup>1</sup>, Susie Ahn<sup>1</sup>, Hua Song<sup>1</sup>, Wei Zhang<sup>1,\*</sup>

<sup>1</sup>Neuro-Oncology Branch, National Cancer Institute and National Institutes of Neurological Disorders & Stroke, National Institutes of Health, Bethesda, MD 20892, USA

\*Co-Correspondence: khongsug@gmail.com, zhangwe@mail.nih.gov

Short title: INPP5F suppresses STAT3 and gliomagenesis

Key words: INPP5F, gliomas, STAT3 signaling

No potential conflicts of interest were disclosed.

## SUPPLEMENTARY FIGURE LEGENDS

**Figure S1. Conforcal microscopy analysis.** GSCs were dissociated and seeded poly-ornithine coated cover slip contained 24 well plates and analyzed with confocal microscope (Zeiss). Both *INPP5F* overexpressed GSCs (923 and 1228) showed decreased STAT3 phosphorylation and translocation compared with their controls.

**Figure S2. Kaplan-Meijer analysis of glioma patient survival associated with *INPP5F* copy number status.** *INPP5F* expression is correlated with patient survivals when all types of glioma patient specimens are segregated based on their *INPP5F* copy number status using the REMBRANDT database. Deletion of *INPP5F* correlated with poor patient survival compared to that with unaltered *INPP5F* in REMBRANDT.

**923**

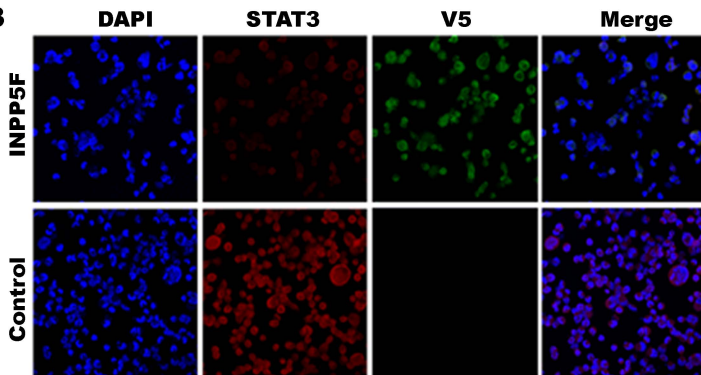

**1228**

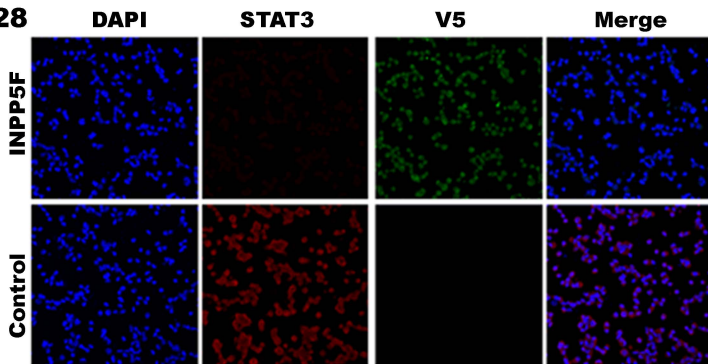

## Supplementary Fig. S2

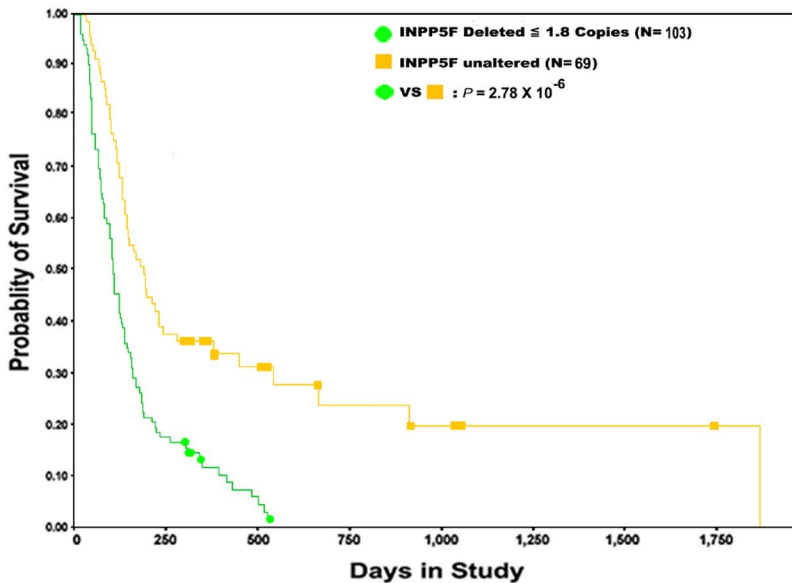

Supplement: srep07330-s1.pdf [file srep07330-s1.pdf]
